# Supplementary material
Source: Springer Nature journal article supplement (https://www.springermedizin.de/resource/supplementary/12883_2010_491_MOESM2_ESM.pdf/9455562)
Supplement: MOESM2 [file 9455562]

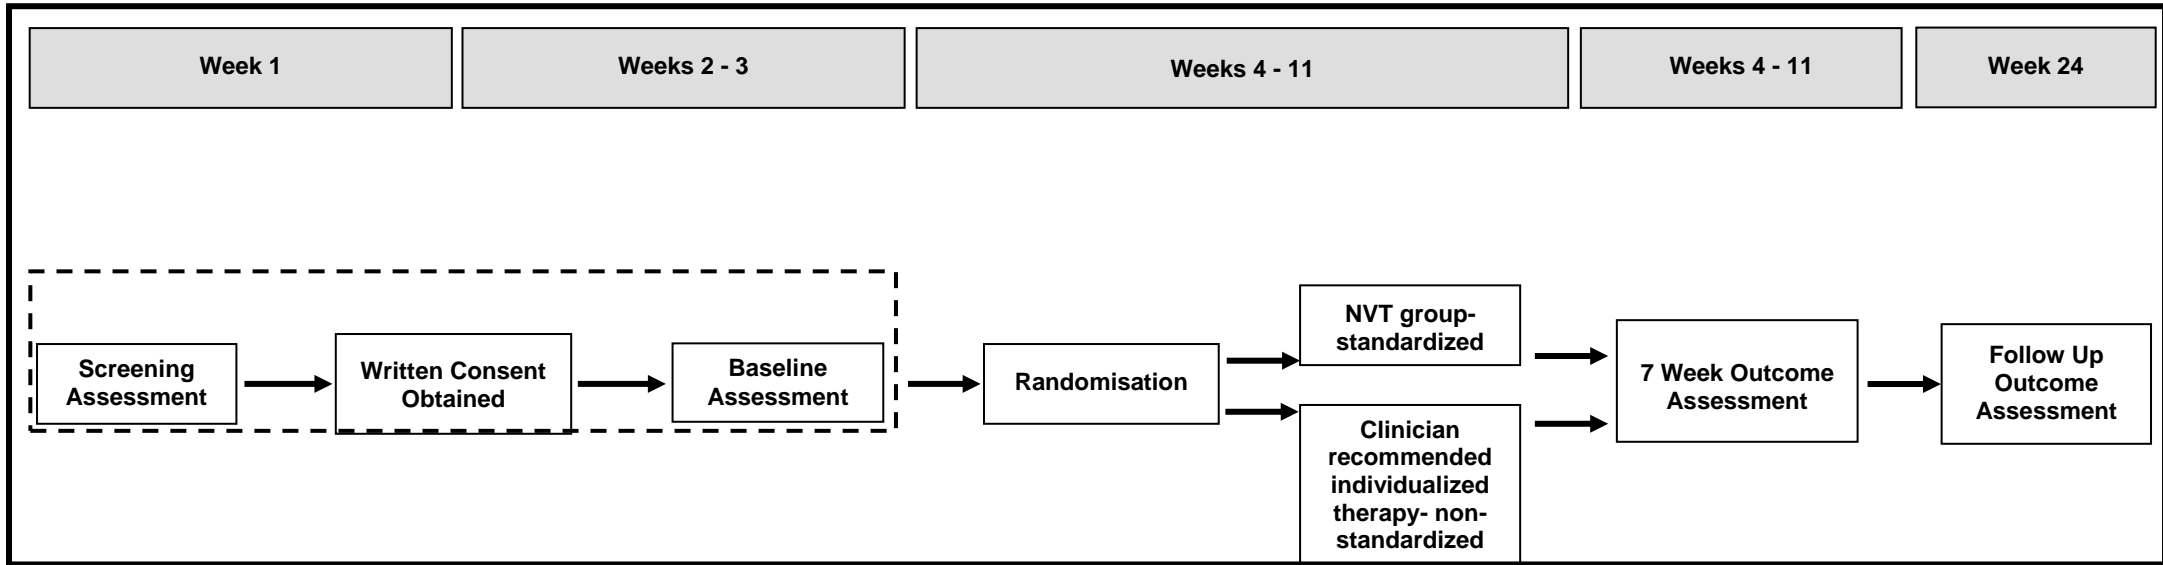

### Screening Assessment Timeline

- Confrontation testing
- Mini-Mental State Examination (MMSE) (22)
- Visual acuity
- Mobility assessment

**Time involved - 1 hour**

### Baseline Assessment Timeline

- Mobility Assessment Course (MAC) – Primary outcome measure
- Other outcome measures:
- Pepper Visual Skills for Reading test
  - Visual Scanning assessment (VSA)
  - National Eye Institute Visual functioning Questionnaire (NE1 VFQ-25)
  - Veteran Low Vision Visual Functional Questionnaire 20 (VA LV VFQ 48)
  - Mayo-Portland Adaptability Inventory (MPAI)
  - Rivermead Behavioural Inattention test (BIT)
- Total - 90 min**

### Outcome Assessment Timeline

- As at Baseline
